# Supplementary figures and images for: In Silico Prediction of Protein Adsorption Energy on Titanium Dioxide and Gold Nanoparticles
Source: MDPI journal article supplement (doi:10.3390/nano10101967), 2020-10-04

ALA

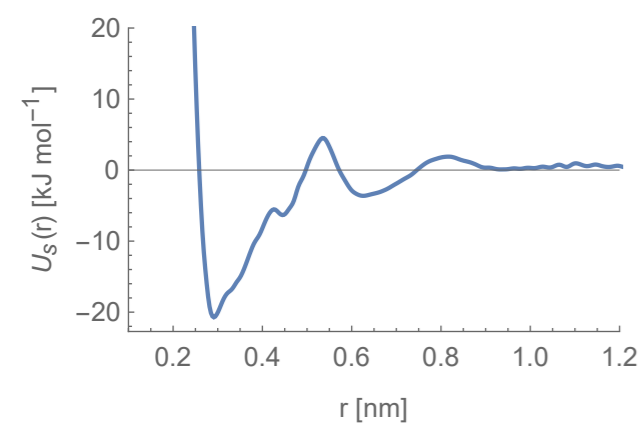

ARG

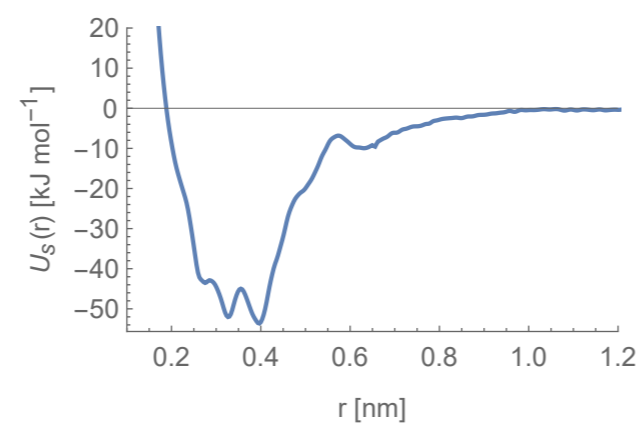

ASN

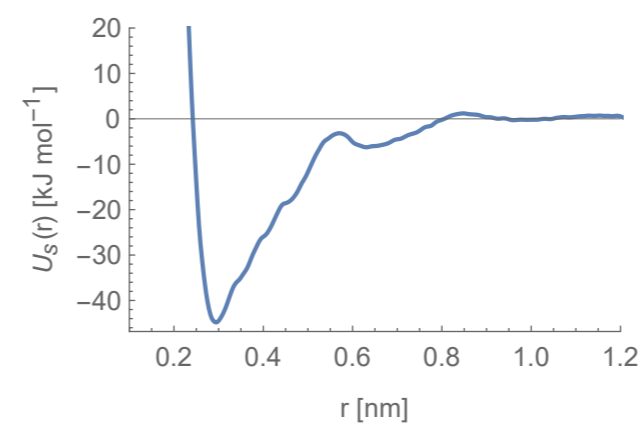

ASPD

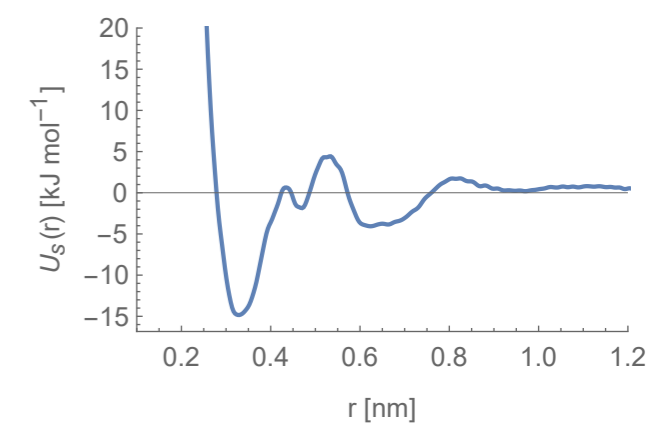

CYS

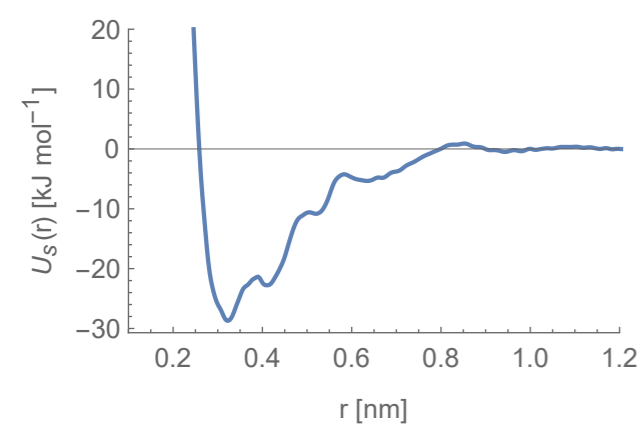

GLN

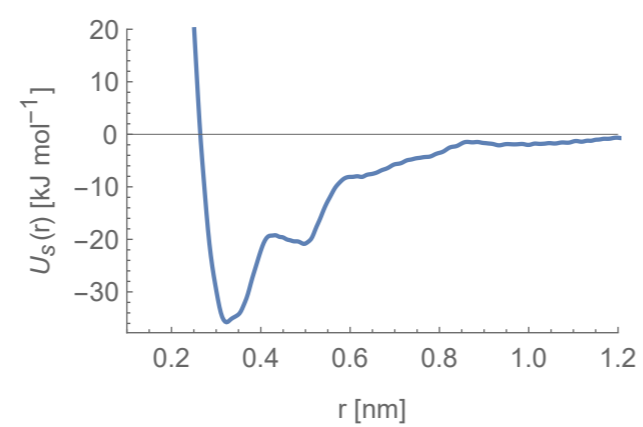

GLU

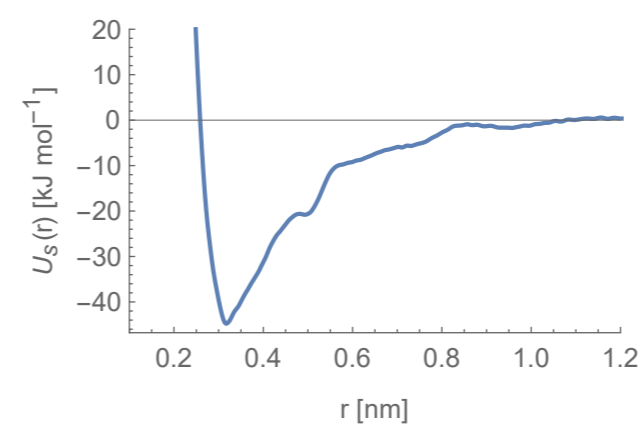

GLY

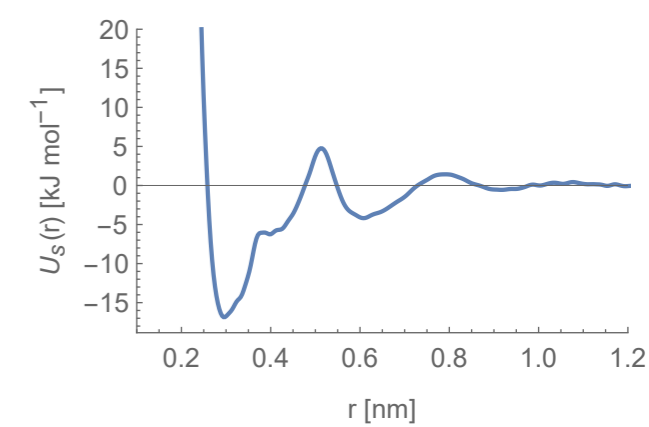

HIS

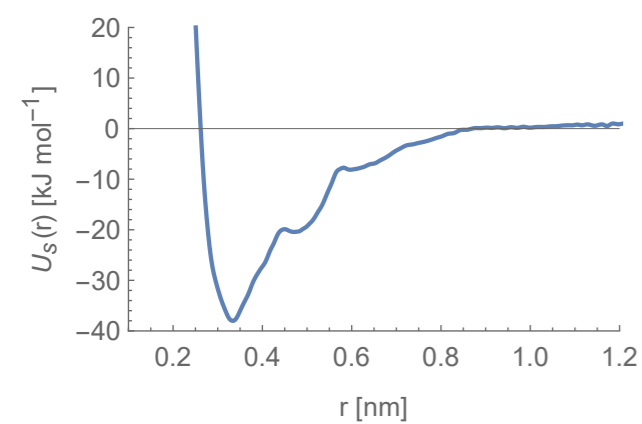

ILE

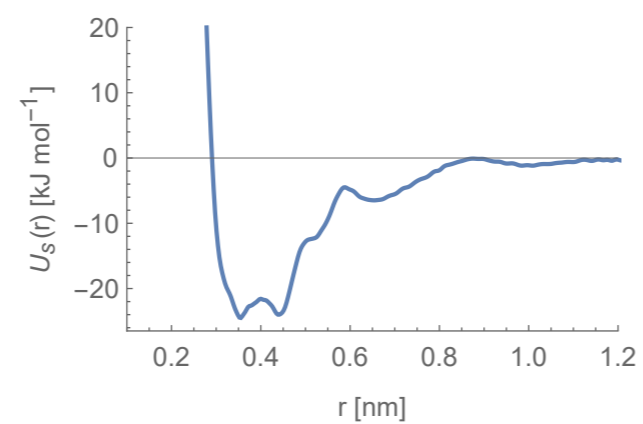

LEU

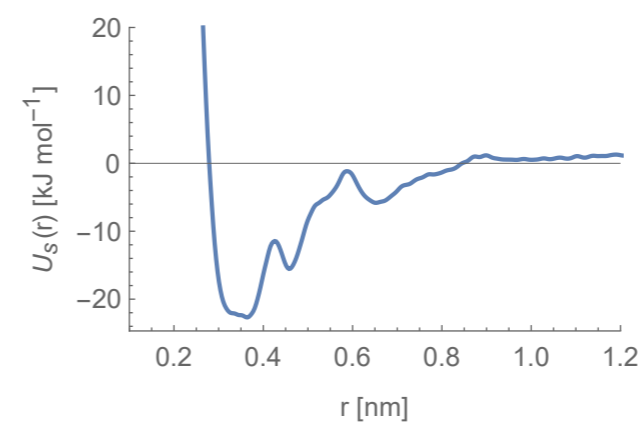

LYS

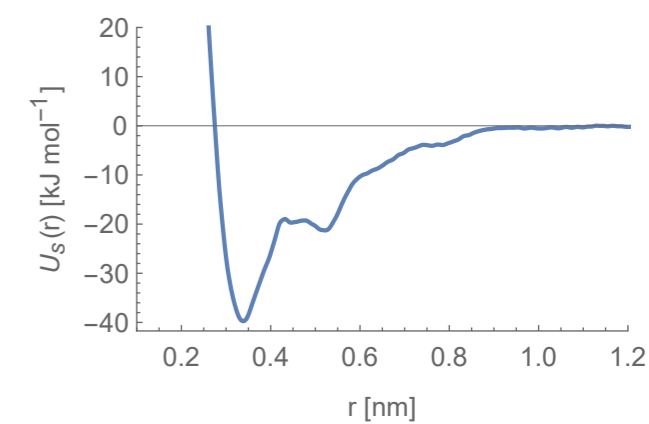

MET

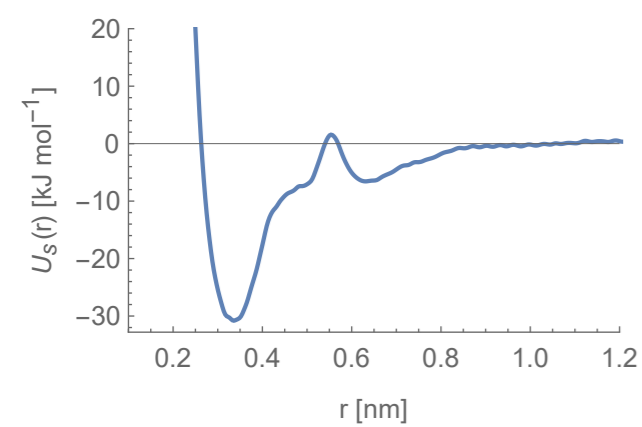

PHE

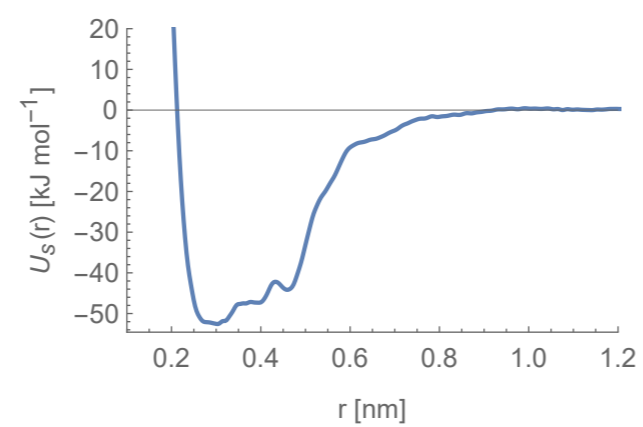

PRO

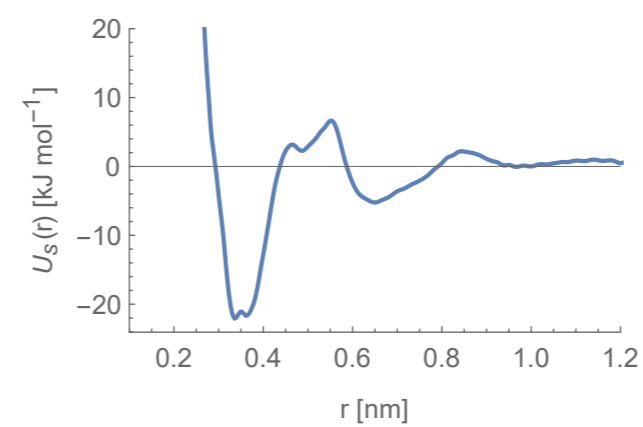

SER

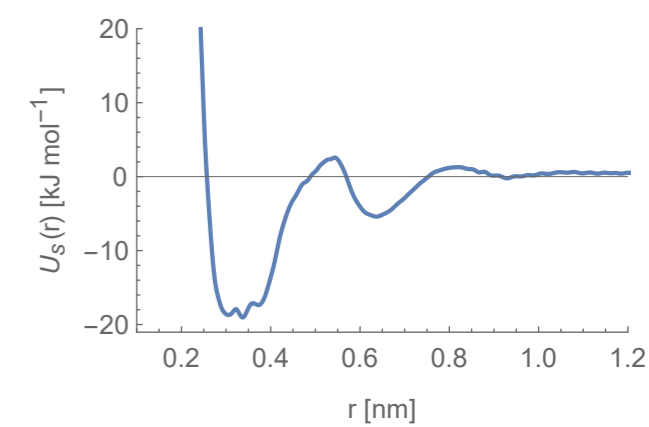

THR

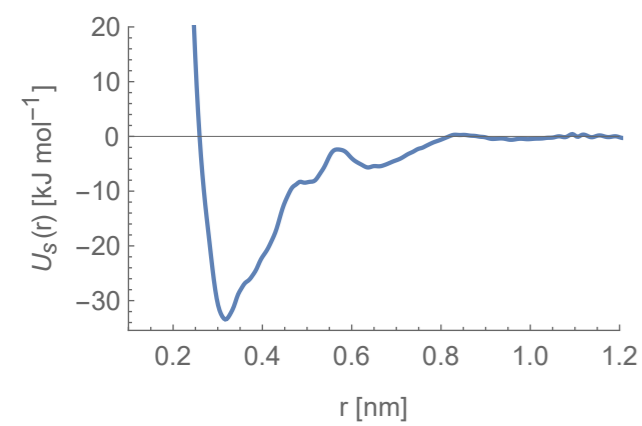

TRP

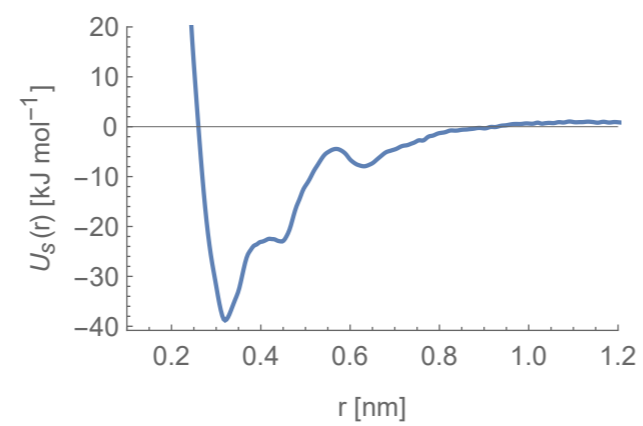

TYR

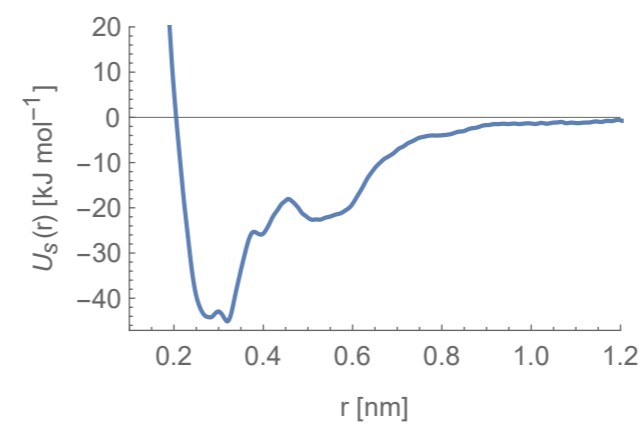

VAL

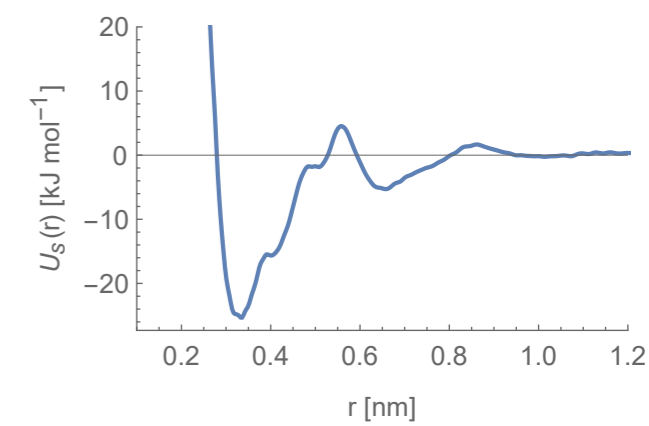

Supplement: s1 [file s1]

ALA

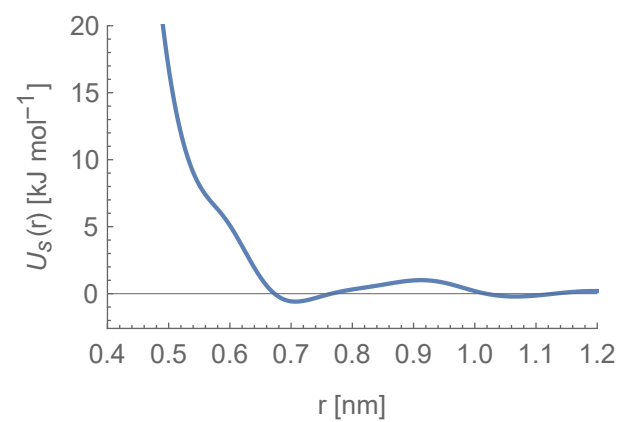

ARG

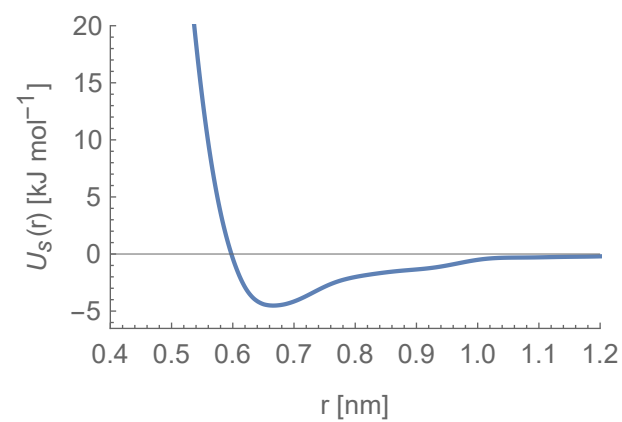

ASN

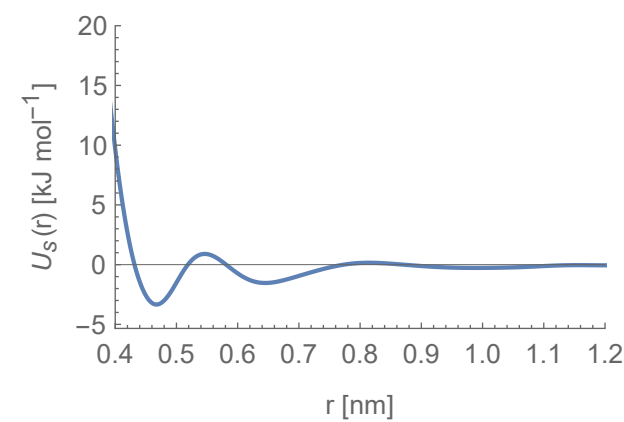

ASR

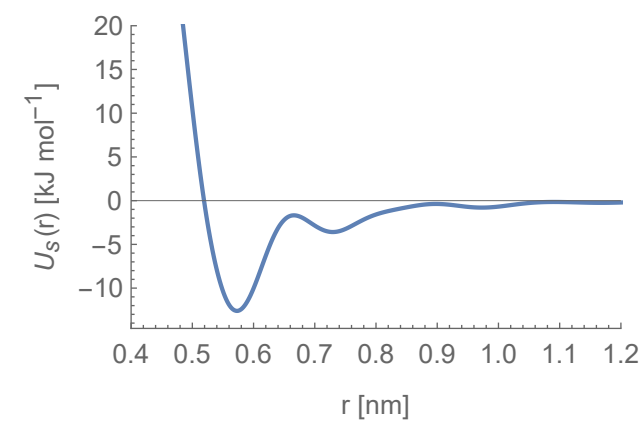

CYS

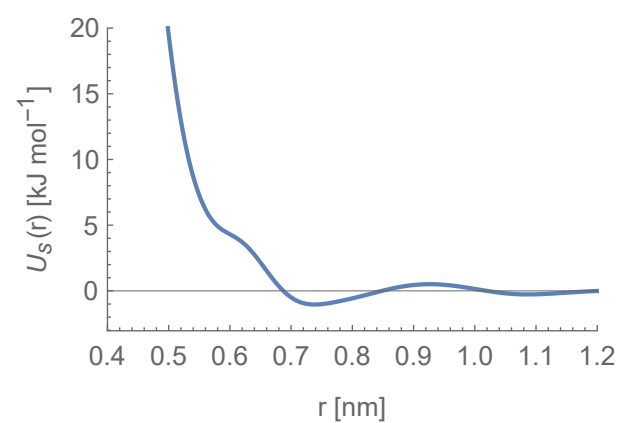

GLN

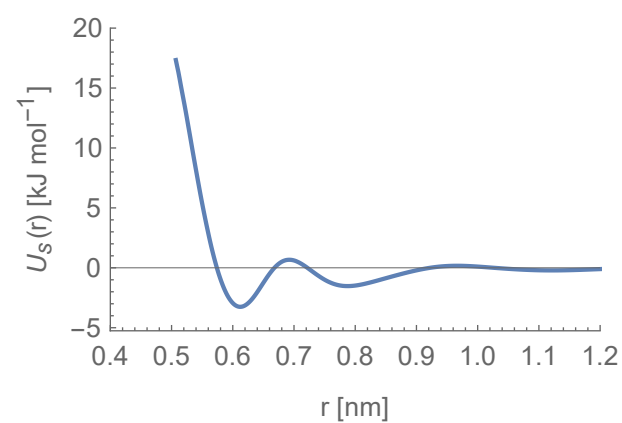

GLU

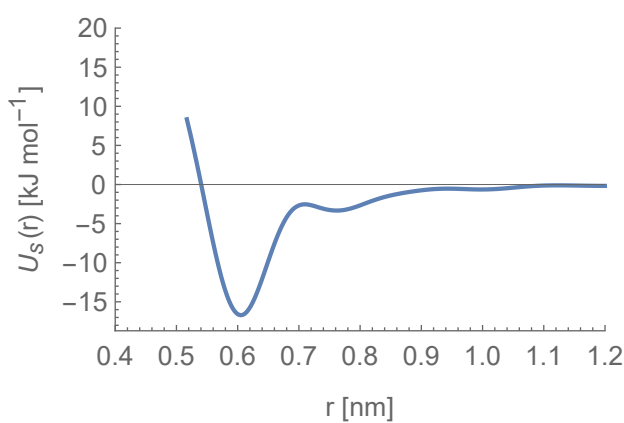

GLY

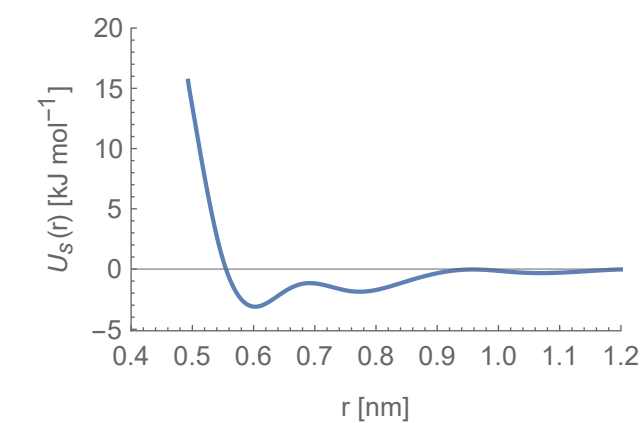

HIS

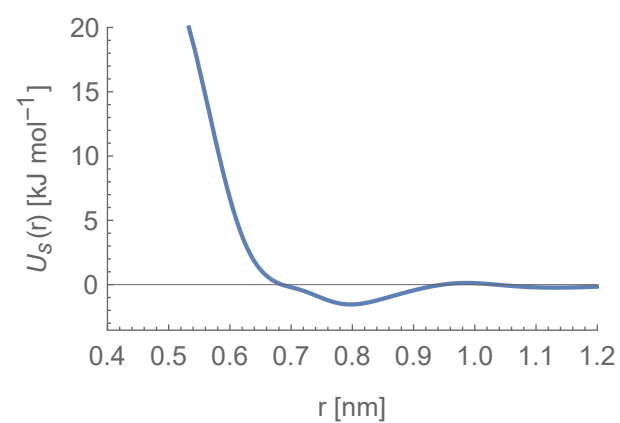

ILE

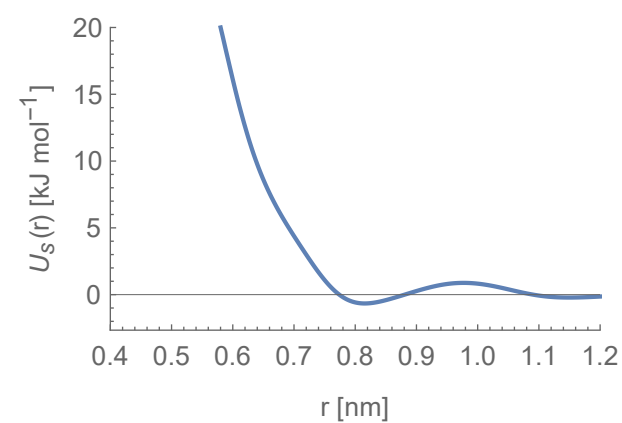

LEU

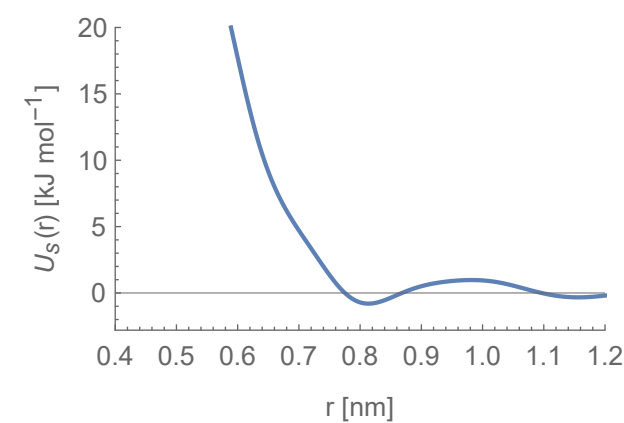

LYS

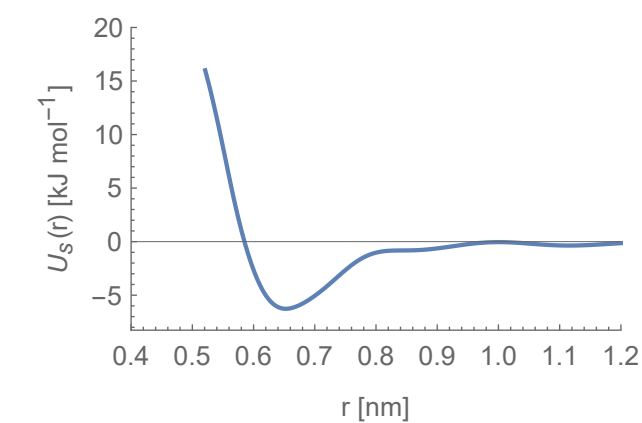

MET

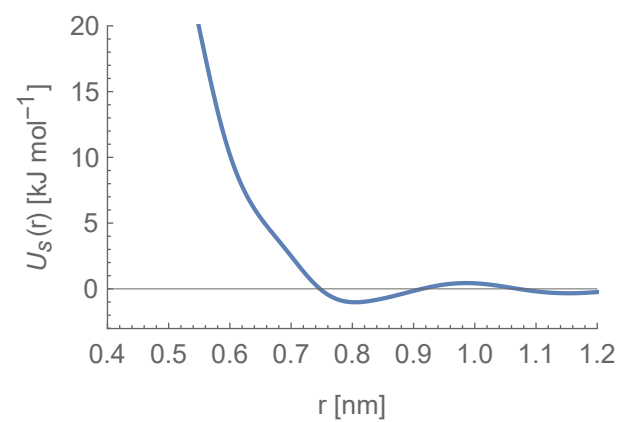

PHE

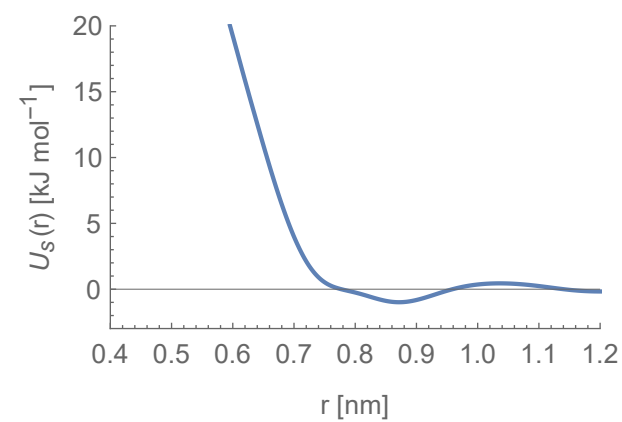

PRO

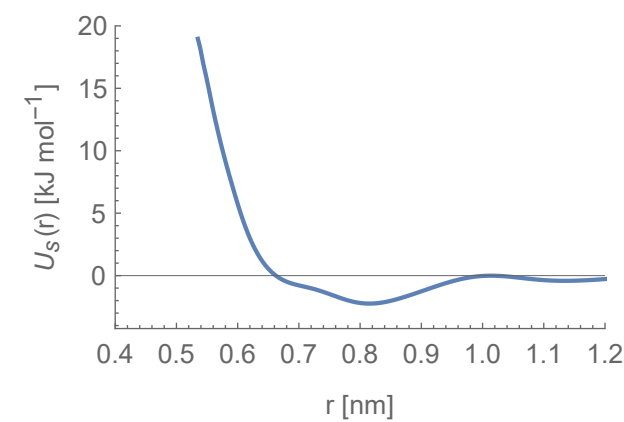

SER

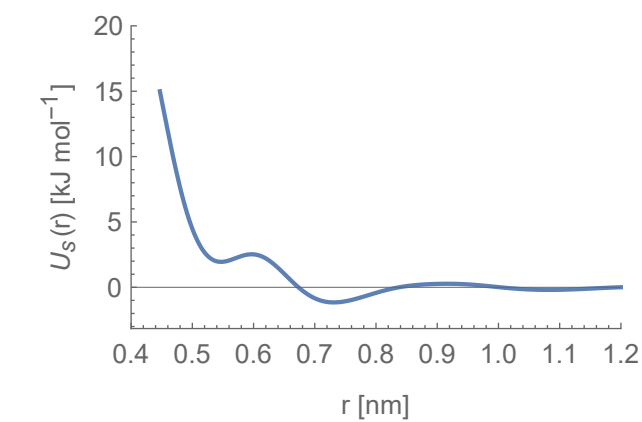

THR

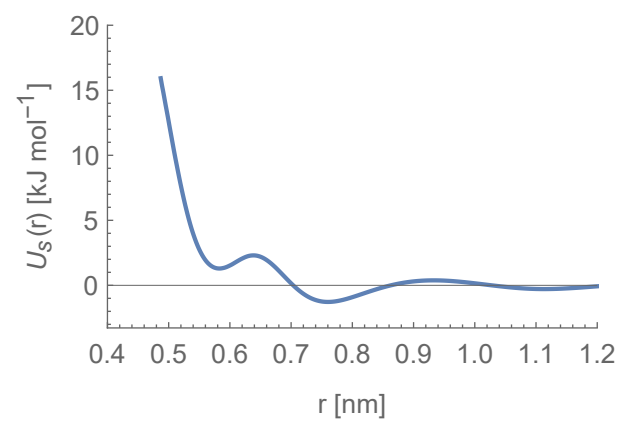

TRP

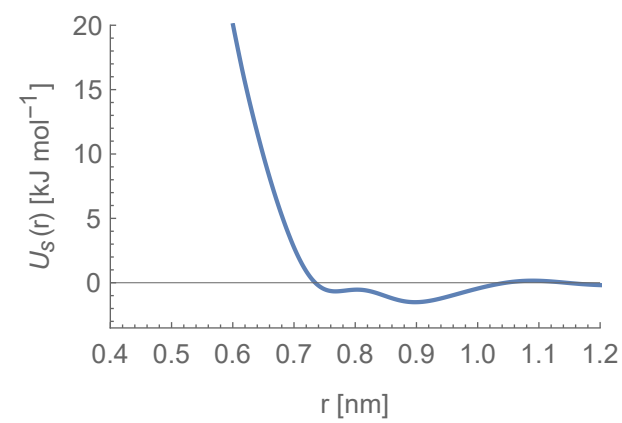

TYR

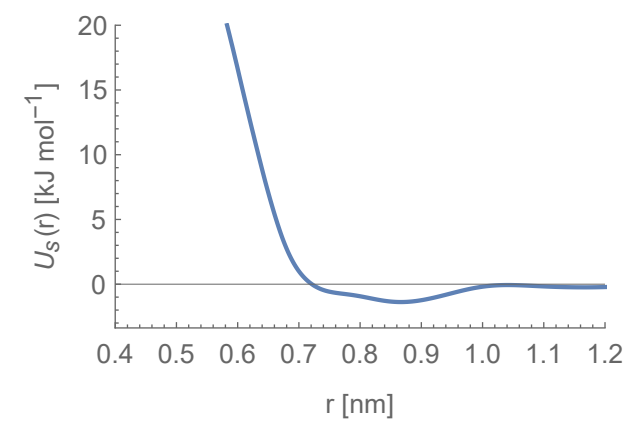

VAL

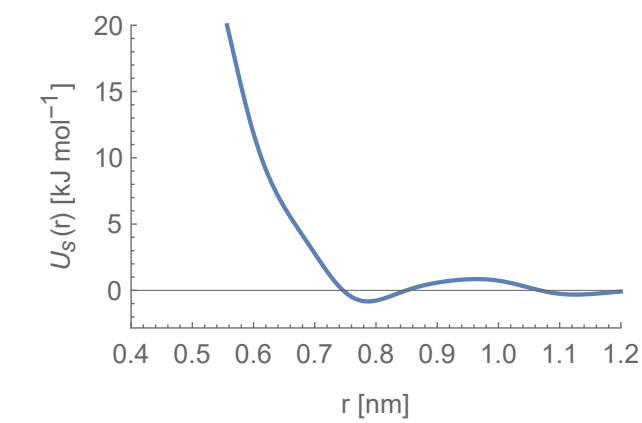

Supplement: s1 [file s1]
